# Supplementary material
Source: PubMed Central journal article supplement (PMC5546995)
Supplement: NIHMS862983-supplement-Supplemental_figures__corrected_.pdf [file NIHMS862983-supplement-Supplemental_figures__corrected_.pdf]

# Figure E1. School Report of Epinephrine Administration

## School Health Unit Massachusetts Department of Public Health

1 School District: \_\_\_\_\_ Name of School: \_\_\_\_\_

2 Age: \_\_\_\_\_ Type of Person: Student  Staff  Visitor  Gender: M  F  Ethnicity: Spanish/Hispanic/Latino: Yes  No

3 Race: American Indian/Alaskan Native  African American  Asian  Native Hawaiian/other Pacific Islander  White  Other

4 History of allergy: Yes  No  Unknown  If known, specify type of allergy: \_\_\_\_\_

If yes, was allergy action plan available? Yes  No  Don't Know  History of anaphylaxis: Yes  No  Unknown

Previous epinephrine use: Yes  No  Don't Know  Diagnosis/History of asthma: Yes  No  Don't Know

5 Date/Time of occurrence: \_\_\_\_\_ Vital signs: BP \_\_\_\_/\_\_\_\_ Temp \_\_\_\_\_ Pulse \_\_\_\_\_ Respiration \_\_\_\_\_

6 If known, specify trigger that precipitated this allergic episode:

Food  Insect Sting  Exercise  Medication  Latex  Other  \_\_\_\_\_ Unknown

If food was a trigger, please specify which food \_\_\_\_\_

Please check: Ingested  Touched  Inhaled  Other  specify \_\_\_\_\_

7. Did reaction begin prior to school? Yes  No  Don't Know

8. Location where symptoms developed:

Classroom  Cafeteria  Health Office  Playground  Bus  Other  specify \_\_\_\_\_

9. How did exposure occur?  
\_\_\_\_\_  
\_\_\_\_\_

10. Symptoms: (Check all that apply)

### Respiratory

- Cough
- Difficulty breathing
- Hoarse voice
- Nasal congestion/rhinorrhea
- Swollen (throat, tongue)
- Shortness of Breath
- Stridor
- Tightness (chest, throat)
- Wheezing

### GI

- Abdominal discomfort
- Diarrhea
- Difficulty swallowing
- Oral Pruritis
- Nausea
- Vomiting

### Skin

- Angioedema
- Flushing
- General pruritis
- General rash
- Hives
- Lip swelling
- Localized rash
- Pale

### Cardiac/Vascular

- Chest discomfort
- Cyanosis
- Dizziness
- Faint/Weak pulse
- Headache
- Hypotension
- Tachycardia

### Other

- Diaphoresis
- Irritability
- Loss of consciousness
- Metallic taste
- Red eyes
- Sneezing
- Uterine cramping

11 Location where epinephrine administered: Health Office  Other  specify \_\_\_\_\_

12 Location of epinephrine storage: Health Office  Other  specify \_\_\_\_\_

13 Epinephrine administered by: RN  Self  Other

If epinephrine was self-administered by a student at school or a school-sponsored function, was the student formally trained?

Yes  If known, date of training \_\_\_\_\_ No

Did the student follow school protocols to notify school personnel and activate EMS? Yes  No  NA

If epinephrine was administered by other, please specify \_\_\_\_\_

Was this person formally trained? Yes  Date of training \_\_\_\_\_ No  Don't know

Expiration date of epinephrine \_\_\_\_\_ Don't Know

# Figure E1. School Report of Epinephrine Administration

14 Time elapsed between onset of symptoms and communication of symptoms: \_\_\_\_\_minutes

15 Time elapsed between communication of symptoms and administration of epinephrine: \_\_\_\_\_minutes

16 Individual Health Care Plan (IHCP) in place? Yes  No  Don't know

17 Written school district policy on management of life-threatening allergies in place? Yes  No  Don't know

18 School district/school registered with MDPH for epinephrine training? Yes  No  Don't know

### Disposition:

19 Transferred to ER: Yes  No  Don't know

If yes, transferred via ambulance  Parent/Guardian  Other  Discharged after \_\_\_\_\_ hours

Was a second epi-pen dose required? Yes  No  Don't know

If yes, was that dose administered at the school prior to arrival of EMS? Yes  No  Don't know

Approximate time between the first and second dose \_\_\_\_\_

Biphasic reaction: Yes  No  Don't know

20 Hospitalized: Yes  If yes, discharged after \_\_\_\_\_ days No

21 Student/Staff/Visitor outcome: \_\_\_\_\_

### If first occurrence of allergic reaction:

a. Was the individual prescribed an Epi Pen in the ER? Yes  No  Don't know

b. If yes, who provided Epi Pen training? ER  PCP  School Nurse  Other  \_\_\_\_\_ Don't know

c. Did the ER refer the individual to PCP and/or allergist for follow-up? Yes  No  Don't know

### School Follow-up:

22 Did a debriefing meeting occur? Yes  No  Did family notify prescribing MD? Yes  No  Don't know

23 Recommendation for changes: Protocol change  Policy change  Educational change  Information sharing  None

24 Comments:

\_\_\_\_\_  
\_\_\_\_\_  
\_\_\_\_\_

25 Form completed by: \_\_\_\_\_ Date: \_\_\_\_\_  
(please print)

Title: \_\_\_\_\_

Phone number: (\_\_\_\_\_) \_\_\_\_\_ - \_\_\_\_\_ Ext.: \_\_\_\_\_ Email : \_\_\_\_\_

School District: \_\_\_\_\_

School address: \_\_\_\_\_

## Figure E2. School Policy Survey

1. School district:
2. School name(s):
3. Is your school considered “peanut free”?
  - YES
  - NO
4. How does your school define “peanut free”?  
PLEASE SPECIFY
5. Does your school have any of the following accommodations in place?
  - a. Allowed to bring peanuts (and peanut containing foods) from home?
    - YES
    - NO
  - b. Peanuts (and peanut containing foods) served by the school?
    - YES
    - NO
  - c. Peanut (and peanut containing foods) free tables?
    - YES
    - NO
  - d. Peanut (and peanut containing foods) free classrooms?
    - YES
    - NO
  - e. Other  
PLEASE SPECIFY
6. For how long has your school been adhering to its current policy (i.e. academic year XXXX-XXXX)?  
PLEASE SPECIFY
7. Do you think that peanut-free schools are safer for children with food allergies compared to non-peanut-free schools?
  - YES
  - NO
